# Supplementary material for: Models that learn how humans learn: The case of decision-making and its disorders
Source: PLOS journal article supplement (doi:10.1371/journal.pcbi.1006903), 2019-06-11
Supplement: S28 (10.1371/journal.pcbi.1006903.s028) [file journal.pcbi.1006903.s028]

**Table S8.** Mean and standard deviation of negative log-likelihood for RNN over 15 different initialisations of the model and optimised over all the subjects in each group.

|            | mean (standard deviation) |
|------------|---------------------------|
| HEALTHY    | 9450.937 (81.512)         |
| DEPRESSION | 13268.186 (135.499)       |
| BIPOLAR    | 12885.629 (134.552)       |
